# Supplementary material
Source: PubMed Central journal article supplement (PMC6096350)
Supplement: Supp_Fig1.pdf [file Supp_Fig1.pdf]

## Supplementary Data

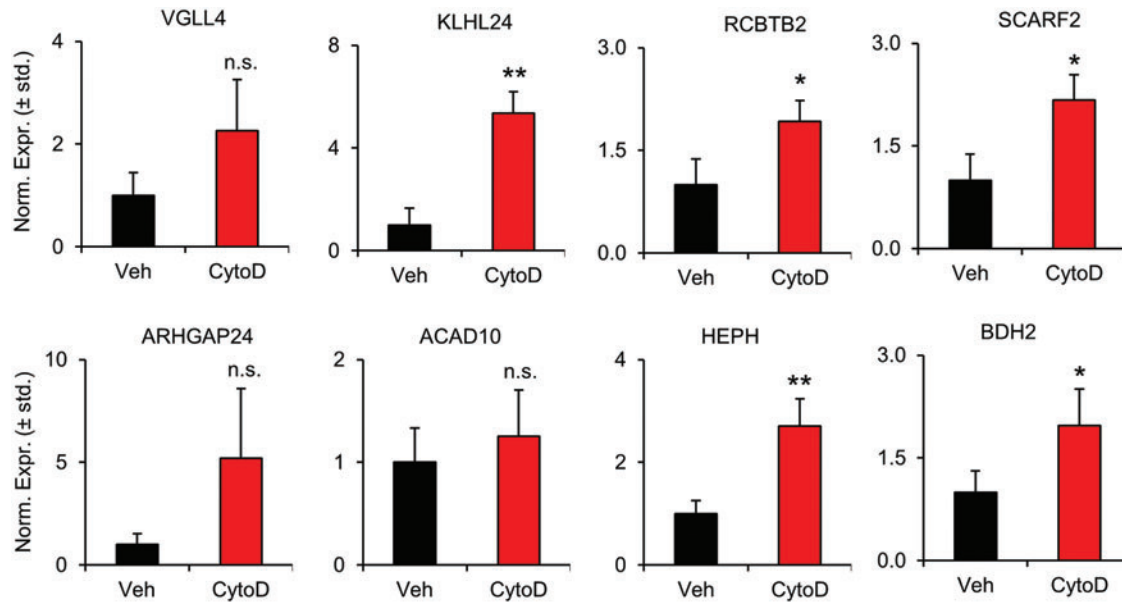

**SUPPLEMENTARY FIG. S1.** Gene expression of newly identified CytoD-responsive genes in hAMSC validated by real-time qPCR analysis. hAMSCs were treated for 24 h with CytoD before RNA isolation. Expression levels were normalized relative to GAPDH and vehicle (veh, DMSO) control. Error bars represent standard deviation of biological triplicates and statistical significance was assessed using Student's *t*-testing (\* $P < 0.05$ ; \*\* $P < 0.01$ ; n.s., not significant,  $P > 0.05$ ). CytoD, cytochalasin D; DMSO, dimethyl sulfoxide; GAPDH, glyceraldehyde 3-phosphate dehydrogenase; hAMSCs, human adipose tissue-derived MSCs; qPCR, quantitative PCR.
